# Supplementary material for: Ag–Cu nanoparticles as efficient catalysts for transesterification of β-keto esters under acid/base-free conditions
Source: Royal Society of Chemistry journal article supplement (doi:10.1039/c6ra00467a), 2016-01-01
Supplement: c6ra00467a1.pdf [file c6ra00467a1.pdf]

Supporting information

**Ag-Cu nanoparticles as efficient catalysts for transesterification of  $\beta$ -keto esters under acid/base-free conditions**

Hongmei Yue <sup>a, b</sup>, Hao Yu <sup>a, b</sup>, Sheng Liu <sup>a, b</sup>, Chunli Xu <sup>a, b, \*</sup>

<sup>a</sup> Key Laboratory of Applied Surface and Colloid Chemistry (Shaanxi Normal University), Ministry of Education, Xi'an 710119, PR China.  
E-mail: [xuchunli@snnu.edu.cn](mailto:xuchunli@snnu.edu.cn)

<sup>b</sup> School of Chemistry and Chemical Engineering, Shaanxi Normal University, Chang'an West Street 620, Xi'an 710119, PR China

\* Corresponding author. E-mail: [xuchunli@snnu.edu.cn](mailto:xuchunli@snnu.edu.cn)

Address for correspondence: School of Chemistry and Chemical Engineering

Shaanxi Normal University

620 Chang'an West Street

Xi'an 710119, P. R. China

Tel: 86-29-81530779

E-mail: [xuchunli@snnu.edu.cn](mailto:xuchunli@snnu.edu.cn)

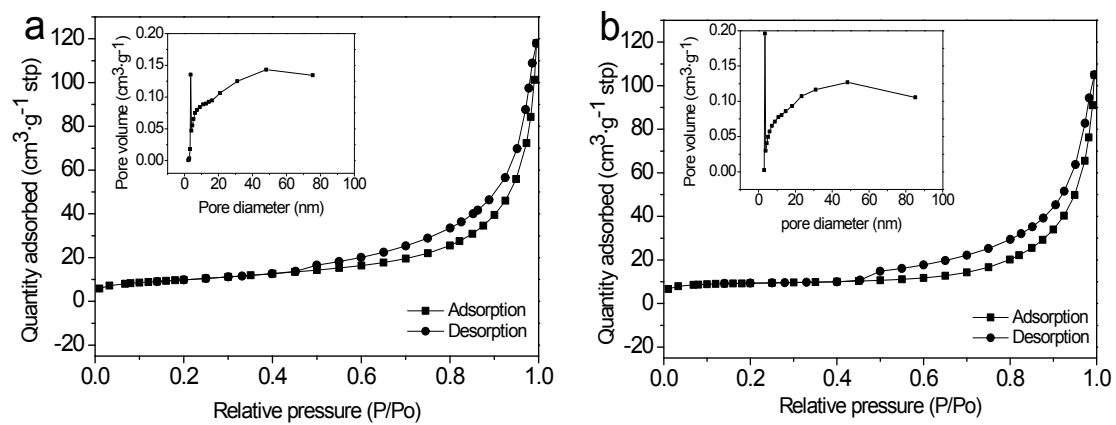

**Fig. S1** Nitrogen physisorption isotherms and BJH pore size distribution for (a) neat HTs and (b) Ag-Cu/HTs.
